# Supplementary material for: Pathogen elicitor peptide (Pep), Systemin, and their receptors in tomato: sequence analysis resolves standing disagreements about biotic stress signaling components
Source: Research Square preprint supplement (doi:10.21203/rs.3.rs-3943786/v1), 2024-02-16
Supplement: Supplementary file 3 [file 3f14ffbf43d23e0473852b49.xlsx]

## Sheet: PROPEP sequences
List of PROPEP sequences and accession entries
Species	Sequence name	Sequence	Database ID	Database or sequence source		name in database
Arabidopsis thaliana	AtPROPEP1	MEKSDRRSEESHLWIPLQCLDQTLRAILKCLGLFHQDSPTTSSPGTSKQPKEEKEDVTMEKEEVVVTSRATKVKAKQRGKEKVSSGRPGQHN			Lori et al., 2015
Arabidopsis thaliana	AtPROPEP2	MEKLDKRREEETYLWIPVQFLDQALIAVLKCIGLLCQPAKKTAPSPVTFNQPEEQEEDYGVALKDDDVVVLLRDNKAKSKKRDKEKPSSGRPGQTNSVPNAAIQVYKED			Lori et al., 2015
Arabidopsis thaliana	AtPROPEP3	MENLRNGEDNGSLIPFTFFDQSSVTIPLLKCSGLESSSSSSSSCDLSSSHSEEDESIDIKEEEEEEEEDGMTIEIKARGKNKTKPTPSSGKGGKHN			Lori et al., 2015
Arabidopsis thaliana	AtPROPEP4	MERGVSYYLWIPFKFIHQTFGSLLLKLLGLRSPSDHSFPEDGEEEVKVVEVSSRGLPGKKNVLKKSRESSGKPGGTNKKPF			Lori et al., 2015
Arabidopsis thaliana	AtPROPEP5	MQQERDHKRDCCKLMPQTVKAFFKCLRFRRSSSSSSDMVKARARNEEKEEPSSIETSTRSLNVMRKGIRKQPVSSGKRGGVNDYDM			Lori et al., 2015
Arabidopsis thaliana	AtPROPEP6	MEVNGEEERRSRREDEEKEDYYYSLLNSPCSVCNKFVQAILKCLGLESSSIPPSSSSSSPSLVEEEDSGTETVEETGFMARITAVLRRRPRPPPYSSGRPGQNN			Lori et al., 2015
Arabidopsis thaliana	AtPROPEP7	MEGEGRREDGDCSYLCIPFNSIRDIFQSFFTRFRGLTPDNSPVTISQEVEEETEVVNIPRSVVSGNVAARKGKQQTSSGKGGGTN			Lori et al., 2015
Arabidopsis thaliana	AtPROPEP8	MDEERRDEEEVSHICIPFQFLNEALKTFLKCLGLHISPSPSISSASSATQDVVSTRGGVIVKSKKAARELPSSGKPGRRN			Lori et al., 2015
Capsicum annuum	CapannPROPEP	MEEGADTREKRESGITTGYDVTKNPMFCLQEAIRTILKCLGFESSKPDHPSSSSSSSSMSNDTKKEEENNIIEEQSEQQKCVFQQDDGQGNQKQDDDPPAEVDDPPPVIEAATGRRRGRPPSRPGVGRGPPPENN	XP_016571574	GenBank	ALTERNATELY XM_016716088.2	PREDICTED: uncharacterized protein LOC107869575 [Capsicum annuum]
Capsicum baccatum	CapbacPROPEP	MEEGADTREKRESGITTGYDVTKNPMFCLQEAIRTILKCLGFESSKPDHPISSSSSSMSNDTKKEEENNIIEDQSEQQKCVFQQDDGQGNQKQDDDPPAEVDDPPPVIEAATSRRRGRPPSRPGVGRGPPPENN	PHT50620.1	GenBank		hypothetical protein CQW23_10367 [Capsicum baccatum]
Capsicum chinense	CapchiPROPEP	MEEGADSREKRESGITTGYDVTKNPMFCLQEAIRTILKCLGFESSKPDHPSSSSSSSSMSNDTKKEEENNIIEEQSEQQKCVFQQDDGQGNQKQDDDPPAEVDDPSPVIEAATGRRRGRSPSRPGVGRGPPPENN	PHU20234.1	GenBank		hypothetical protein BC332_11385 [Capsicum chinense]
Coffea canephora	CocanPROPEP	MEDTTSTGRSSGVGDHDVYNPCSFLRKAASAMLKCLGFDEAKPYVDDHGNKSSSCSKEKDEEKFNNERNGCSGQDDQSSYSPLDPRSSMDPADDPPMEDLAGRGRTPPRPGIRTGNPQTNSSSS	Cc10_g06170	SolGenomics	Coffea canephora protein sequences v1.0	[Cc10_g06170 sequence match in blast db Coffea canephora protein sequences v1.0]
Coffea humblotiana	CohumPROPEP	MEDTSSTRRSSGVGNHDVYNPCSFLRKAVSAMLKCLGFDEAKPYVDDHGNKSSSCSKEKDEEKFNNERNGCSGQDDQSSYSPLDPRSSMDPADDPPMVRDLLDSFFHFLSYHFLLLFNFWPIYFLLADGVPCLFIFLFCVECDVEFD	N/A	SolGenomics	Coffea humblotiana genome	Chr10 Scaffold_33 HRSCAF=255 31790949
Nicotiana benthamiana	NbPROPEP	MGRAYSEEAANITEKRERARVDEESSLTKVYDISKNPIFYFQEAIRAILNCLGFESSKPESSSSSSSSMSDNKEEENNKEEDDPEGKQASTDNNNDNPNTPSADDPPQTQALLTPPAPPPPPGGSPAPPGNHQIEAATRRGRTPPRPGVSRGSPPQNN	Niben101Scf00941g00014.1	SolGenomics	N.benthamiana Genome v1.0.1 predicted proteins	Niben101Scf00941g00014.1 Unknown protein
Nicotiana attenuata	NaPROPEP	MEDITEKKERGRGDEESSLTKVYDISKNPIFYLQEAIRVILNCLGFESSKPESSSSSSSSSSSMSDQKEEKEEENINEESGEKENCVFQEEDGPEVKQASTNINNENPSTPSANDPPQSQTLIEAATRRGRTPPRPGVSRGSPPQNN	XP_019258742.1	GenBank		PREDICTED: elicitor peptide 6 [Nicotiana attenuata]
Nicotiana otophora	NoPROPEP	MEEAADITEKKERGDEETSLTKVYDISKNPIFHFQEAIRAILNCLGFESSKPESSSSSSSSSMSDQKEEKEEENIKEESSEQEKCVFQEEDGPEGKQASTNTNNENPSTPSANDPPQSQTLVRLLFPLLNCALSSLSYEFI	N/A	SolGenomics	Nicotiana otophora genome, published by Sierro, et al. 2014 in Nature Communications	Noto_AWOL01S0014554.1 21839-22204
Nicotiana tabacum	NtabPROPEP	MEEAADITEKKERGDEETSLTKVYDISKNPIFYFQEAIRAILNCLGFESSKPESSSSSSSSSMSDQKEEKEEESIKEESSEQEKCVFQEEDGPEGKQASTNTNNENPSTPSANDPPQSQTLIEAATRRGRTPPRPGVSRGSPPQNN	XP_016480848.1	GenBank		PREDICTED: NAD-dependent protein deacetylase HST1 [Nicotiana tabacum]
Nicotiana sylvestris	NsPROPEP	MEEAADITEKKERGRVDDQESSLTKVYDISKNPIFYFQEAIRAILNCLGFESSKPESSSSSMSDKKEEENNKEDSSEQEEEDDPEGKQASTDNNNDNPNTPSADDPPQSQTLIEAATRRGRTPPRPGVSRGSPPQNN	XP_009802896.1	GenBank		PREDICTED: uncharacterized protein LOC104248345 [Nicotiana sylvestris]
Nicotiana tomentosiformis	NtPROPEP	MEEAADITEKKERGDEETSLTKVYDISKNPIFYFQEAIRAILNCLGFESSKPESSSSSSSSSMSDQKEEKEEESIKEESSEQEKCVFQEEDGPEGKQASTNTNNENPSTPSANDPPQSQTLIEAATRRGRTPPRPGVSRGSPPQNN		SolGenomics	"N.tomentosiformis protein sequences" BLAST dataset	mRNA_46025 gene_25649|id=AT5G64900.1:evalue=0.039:annot='precursor of peptide 1';id=Solyc04g072310.2.1:evalue=2e-21:annot='Unknown Protein'
Petunia axillaris	PetaxPROPEP	MSNTSRVYDVTAKNPMFYFQEAIKAILNCLGFESSKPKDSSSSSSSSSSSSSSSISDKKEEDDKNIKEESEQQQTCVFQEDPEGKKDSDSANNNEDDPPANDPPQSETLIEAATGRRGRTPPKSGISQGSPPQHN	translated from predicted CDS	SolGenomics	Petunia axillaris v1.6.2 gene models	Peaxi162Scf00267g01221.1 unknown protein
Petunia inflata	PetinPROPEP	MEDITEKKERGRGDEESSLTKVYDISKNPIFYLQEAIRVILNCLGFESSKPESSSSSSSSSSSMSDQKEEKEEENINEESGEKENCVFQEEDGPEVKQASTNINNENPSTPSANDPPQSQTLIEAATRRGRTPPRPGVSRGSPPQNN		SolGenomics		NIATv7_g21568.t1 sequence match in blast db N.attenuata v2 annot v5 proteins
Solanum chilense Pep b	SchPROPEPb	MEEKKESRSSVYDEVITKNPFFYLQECIKAILKCLGFESSKLVHQASSSSSSSSSSSSSSSSMLGTNSKKEEEESEKQEQECVLFHEDGNKQGSDSTNDNYENDPPVETNDEDPTQSETLILATDRRGRPPSRPKVVSGPPPQNN	SOLCI003173400	SolGenomics	Solanum chilense CDS from Stam et al. 2019	###
Solanum chilense	SchPROPEP	MEEKKESRSSVYDEVITKNQFFYLQECIKAILKCLGFESSKLVHQASSSSSSSSSSSMLGTNNKEEEEESEKQEQECVLFHEDGNKQGSDSTNDNYENDPPVETNDEDPTQSETPILATDRRGRPPSRPKVGSGPPPQNN	SOLCI004017000	SolGenomics	Solanum chilense CDS from Stam et al. 2019	###	TMW91507.1	hypothetical protein EJD97_014268 [Solanum chilense]
Solanum commersonii	ScoPROPEP	MEEKKESRSVYDEVITKNPMFYLQEGIKAILKCLGFESSKLVHQASSSSSSSSSMSDTNKKEEEESEKQEQECVLFQEDGNKQGSDSTNDNSKNDPPVENDDEDPPQSETLILATERRGRPPSRPKVGSGPPPQNN	KAG5568359.1	GenBank		hypothetical protein H5410_023767 [Solanum commersonii]
Solanum lycopersicum	SlPROPEP	MEEKKESRSSVYDEVITKNPFFYLQEGIKAILKCLGFESSKLVHQASSSSSSSSSSSSSSSSSMLGTNNKKEEEESEKQEQECVLFHEDGKKQGSDSTNDNYENDPPAETNDEDPTLILATDRRGRPPSRPKVGSGPPPQNN	XP_004237854.1	GenBank	Huffaker et al. 2013	histone-lysine N-methyltransferase SETD1B-A [Solanum lycopersicum]
Solanum melongena	SmPROPEP	MEEKKDGRVCEDNVITKNPMFYLQQGIKAFLKCLGFESPNLVDTNKKEQEDGNKQGSDSSNDNYKNDPPVQAVYEDPPQSQTLVIEAATRRRGRPPPKPPIGSGSPPQNN			Huffaker et al. 2013
Solanum pennelli	SpenPROPEP	MEEKKESRSSVYDEVITKNPFFYLQEGIKAILKCLGFESSKLVHQASSSSSSSSSSSSSSMLGTNNKKEEEESEKQEQECVLFHEDGNKQGSDSTNDNYENNPPVETNDEDPPQSETLILATDRRGRPPSRPKVGSGPPPQNN	XP_015072117.1	GenBank		UBX domain-containing protein 7 homolog [Solanum pennellii]
Solanum pimpinellifolium	SpimPROPEP	MEEKKESRSSVYDEVITKNPFFYLQEGIKAILKCLGFESSKLVHQASSSSSSSSSSSSSSSSSMLGTNNKKEEEESEKQEQECVLFHEDGKKQGSDSTNDNYENDPPAETNDEDPTLILATDRRGRPPSRPKVGSGPPPQNN	Sopim04g072310	SolGenomics	"S. pimpinellifolium protein sequences LA1589" BLAST dataset
Solanum tuberosum	StPROPEP	MFYLQEGIKAILKCLGFESSKLVHQASSSSSSSSSSSSMSDTNKKEEEESEKQEQECVLFQEDGNKQGSDSTNDNYKNDPPVENDDEDPPQSETLILATERRGRPPSRPKVGSGPPPQNN			Huffaker et al. 2013
